# Supplementary material for: Bacteroides ovatus alleviates dysbiotic microbiota-induced intestinal graft-versus-host disease
Source: PubMed Central journal article supplement (PMC9915792; doi:10.21203/rs.3.rs-2460097/v1), 2023-01-31
Supplement: NIHPPRS2460097V1-supplement-1.pdf [file NIHPPRS2460097V1-supplement-1.pdf]

## Supplemental information

**Table S1. Patient characteristics of all allo-HSCT patients with aGI-GVHD.**

|                                      | n = 37      |
|--------------------------------------|-------------|
| Median age (range), y                | 55 (22-74)  |
| Male, n (%)                          | 26 (70%)    |
| Donor type, n (%)                    |             |
| MRD                                  | 11 (30%)    |
| MUD                                  | 20 (54%)    |
| Haplo                                | 6 (16%)     |
| Cell source, n (%)                   |             |
| Bone marrow                          | 4 (11%)     |
| Peripheral blood                     | 33 (89%)    |
| Conditioning, n (%)                  |             |
| Myeloablative                        | 24 (65%)    |
| Non-myeloablative                    | 13 (35%)    |
| GVHD prophylaxis, n (%)              |             |
| PTCy/Tacrolimus                      | 8 (22%)     |
| PTCy/Tacrolimus/MMF                  | 8 (22%)     |
| Tacrolimus/MTX                       | 9 (24%)     |
| Tacrolimus/MTX/ATG                   | 5 (14%)     |
| Tacrolimus/MMF                       | 5 (14%)     |
| Tacrolimus/MMF/ATG                   | 2 (5%)      |
| Median day of aGI-GVHD onset (range) | 36 (13-367) |
| aGI-GVHD clinical stages, n (%)      |             |
| Stage 0-2                            | 25 (68%)    |
| Stage 3-4                            | 11 (30%)    |
| Unknown                              | 1 (3%)      |
| Histology grades of the colon, n (%) |             |
| Grade 0-2                            | 28 (76%)    |
| Grade 3-4                            | 9 (24%)     |

ATG, anti-thymocyte globulin; GVHD, graft-versus-host disease; aGI-GVHD, acute gastrointestinal GVHD; Haplo, human leukocyte antigen (HLA)-haploidentical related donor; MRD, HLA-matched related donor; MTX, methotrexate; MMF, mycophenolate mofetil; MUD, HLA-matched unrelated donor; PTCy, post-transplant cyclophosphamide.

**Table S2. Patient characteristics of allo-HSCT patients who were classified into clusters 1 and 2 by intestinal microbiome profiling at the onset of aGI-GVHD.**

|                                      | Cluster 1<br>(n = 9) | Cluster 2<br>(n = 28) | <i>P</i> value |
|--------------------------------------|----------------------|-----------------------|----------------|
| Median age (range), y                | 60 (46-69)           | 51 (22-74)            | 0.05           |
| Male, n (%)                          | 7 (78%)              | 19 (66%)              | 0.01           |
| Donor type, n (%)                    |                      |                       | 0.9            |
| MRD                                  | 3 (33%)              | 8 (28%)               |                |
| MUD                                  | 5 (56%)              | 15 (54%)              |                |
| Haplo                                | 1 (11%)              | 5 (18%)               |                |
| Cell source, n (%)                   |                      |                       | 1.0            |
| Bone marrow                          | 1 (11%)              | 3 (11%)               |                |
| Peripheral blood                     | 8 (89%)              | 25 (89%)              |                |
| Conditioning, n (%)                  |                      |                       | 1.0            |
| Myeloablative                        | 6 (66%)              | 18 (64%)              |                |
| Non-myeloablative                    | 3 (33%)              | 10 (36%)              |                |
| GVHD prophylaxis, n (%)              |                      |                       | 0.9            |
| PTCy/Tacrolimus                      | 2 (22%)              | 6 (21%)               |                |
| PTCy/Tacrolimus/MMF                  | 3 (33%)              | 5 (18%)               |                |
| Tacrolimus/MTX                       | 3 (33%)              | 6 (21%)               |                |
| Tacrolimus/MTX/ATG                   | 0 (0%)               | 5 (18%)               |                |
| Tacrolimus/MMF                       | 0 (0%)               | 5 (18%)               |                |
| Tacrolimus/MMF/ATG                   | 1 (11%)              | 1 (3%)                |                |
| Median day of aGI-GVHD onset (range) | 27 (14-127)          | 41 (13-367)           | 0.04           |
| aGI-GVHD clinical stages, n (%)      |                      |                       | 0.8            |
| Stage 0-2                            | 7 (77%)              | 18 (64%)              |                |
| Stage 3-4                            | 2 (22%)              | 9 (32%)               |                |
| Unknown                              | 0 (0%)               | 1 (4%)                |                |
| Histology grades of the colon, n (%) |                      |                       | 0.4            |
| Grade 0-2                            | 8 (88%)              | 20 (71%)              |                |
| Grade 3-4                            | 1 (11%)              | 8 (29%)               |                |

Non-repeated ANOVA was used to compare continuous variables, while chi-square or Fisher exact test was used to analyze the frequency distribution between categorical variables. *P*-value under 0.05 was considered statistically significant. ATG, anti-thymocyte globulin; GVHD, graft-versus-host disease; aGI-GVHD, acute gastrointestinal GVHD; Haplo, human leukocyte antigen (HLA)-haploidentical related donor; MRD, HLA-matched related donor; MTX, methotrexate; MMF, mycophenolate mofetil; MUD, HLA-matched unrelated donor; PTCy, post-transplant cyclophosphamide.

**Table S3. Patient characteristics of allo-HSCT patients who underwent intestinal microbiome profiling at the onset of aGI-GVHD.**

|                                      | Steroid-responsive<br>(n = 20) | Steroid-refractory<br>(n = 17) | <i>P</i> value |
|--------------------------------------|--------------------------------|--------------------------------|----------------|
| Median age (range), y                | 62 (46-74)                     | 45 (22-71)                     | 0.0001         |
| Male, n (%)                          | 11 (55%)                       | 13 (77%)                       | 0.3            |
| Donor type, n (%)                    |                                |                                | 0.6            |
| MRD                                  | 5 (25%)                        | 6 (35%)                        |                |
| MUD                                  | 13 (65%)                       | 7 (41%)                        |                |
| Haplo                                | 2 (10%)                        | 4 (24%)                        |                |
| Cell source, n (%)                   |                                |                                | 1.0            |
| Bone marrow                          | 2 (10%)                        | 2 (10%)                        |                |
| Peripheral blood                     | 18 (86%)                       | 17 (85%)                       |                |
| Conditioning, n (%)                  |                                |                                | 0.7            |
| Myeloablative                        | 12 (60%)                       | 12 (71%)                       |                |
| Non-myeloablative                    | 8 (40%)                        | 5 (29%)                        |                |
| GVHD prophylaxis, n (%)              |                                |                                | 0.5            |
| PTCy/Tacrolimus                      | 7 (35%)                        | 1 (6%)                         |                |
| PTCy/Tacrolimus/MMF                  | 4 (20%)                        | 4 (24%)                        |                |
| Tacrolimus/MTX                       | 4 (20%)                        | 5 (29%)                        |                |
| Tacrolimus/MTX/ATG                   | 1 (5%)                         | 4 (24%)                        |                |
| Tacrolimus/MMF                       | 2 (10%)                        | 3 (18%)                        |                |
| Tacrolimus/MMF/ATG                   | 2 (10%)                        | 0 (0%)                         |                |
| Median day of aGI-GVHD onset (range) | 32 (14-367)                    | 42 (13-253)                    | 0.13           |
| aGI-GVHD clinical stages, n (%)      |                                |                                | 0.03           |
| Stage 1-2                            | 18 (90%)                       | 7 (41%)                        |                |
| Stage 3-4                            | 2 (10%)                        | 9 (53%)                        |                |
| Unknown                              | 0 (0%)                         | 1 (5%)                         |                |
| Histology grades of the colon, n (%) |                                |                                | 0.005          |
| Grade 0-2                            | 19 (95%)                       | 9 (53%)                        |                |
| Grade 3-4                            | 1 (5%)                         | 8 (47%)                        |                |

Non-repeated ANOVA was used to compare continuous variables, while chi-square or Fisher exact test was used to analyze the frequency distribution between categorical variables. *P*-value under 0.05 was considered statistically significant. ATG, anti-thymocyte globulin; GVHD, graft-versus-host disease; aGI-GVHD, acute gastrointestinal GVHD; Haplo, human leukocyte antigen (HLA)-haploidentical related donor; MRD, HLA-matched related donor; MTX, methotrexate; MMF, mycophenolate mofetil; MUD, HLA-matched unrelated donor; PTCy, post-transplant cyclophosphamide.
